# Supplementary material
Source: PubMed Central journal article supplement (PMC1748249)
Supplement: pnas_0609239103_1.pdf [file pnas_0609239103_1.pdf]

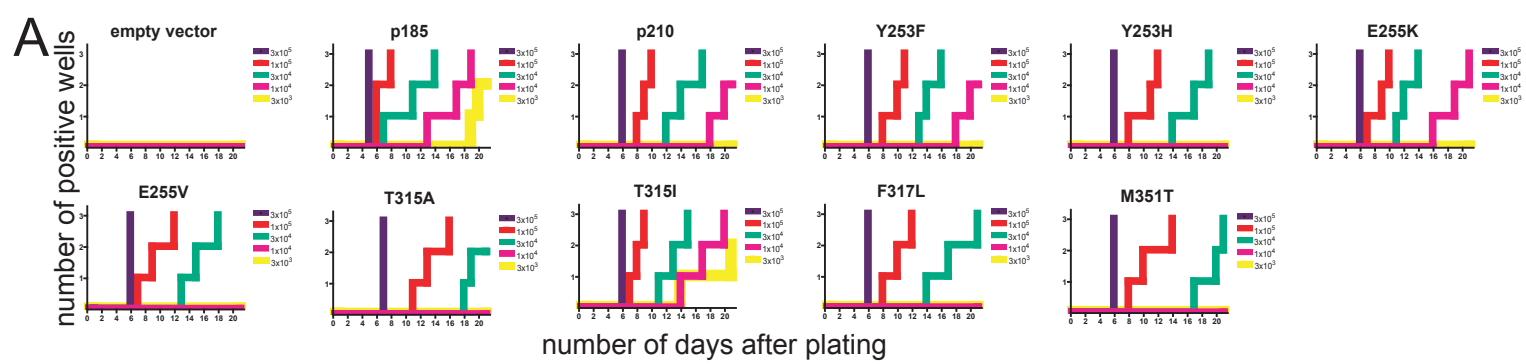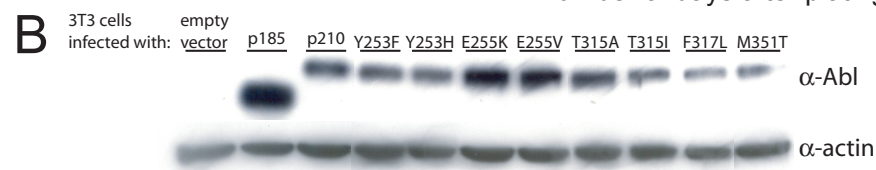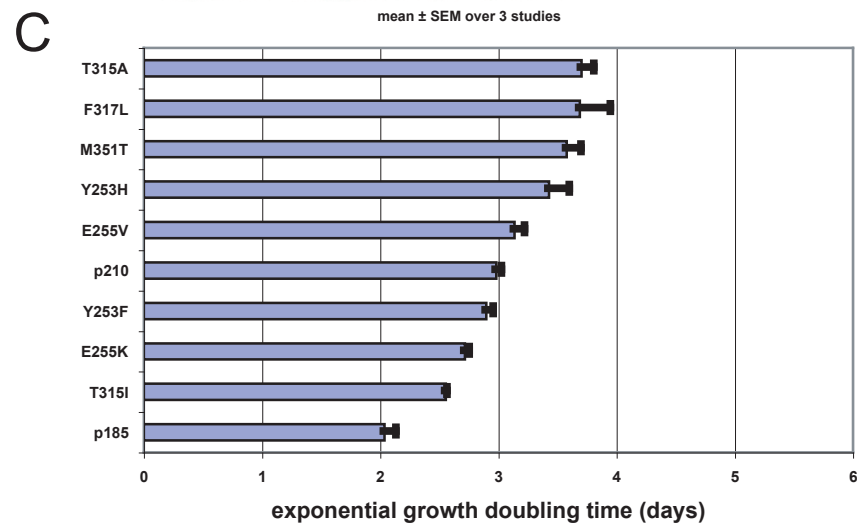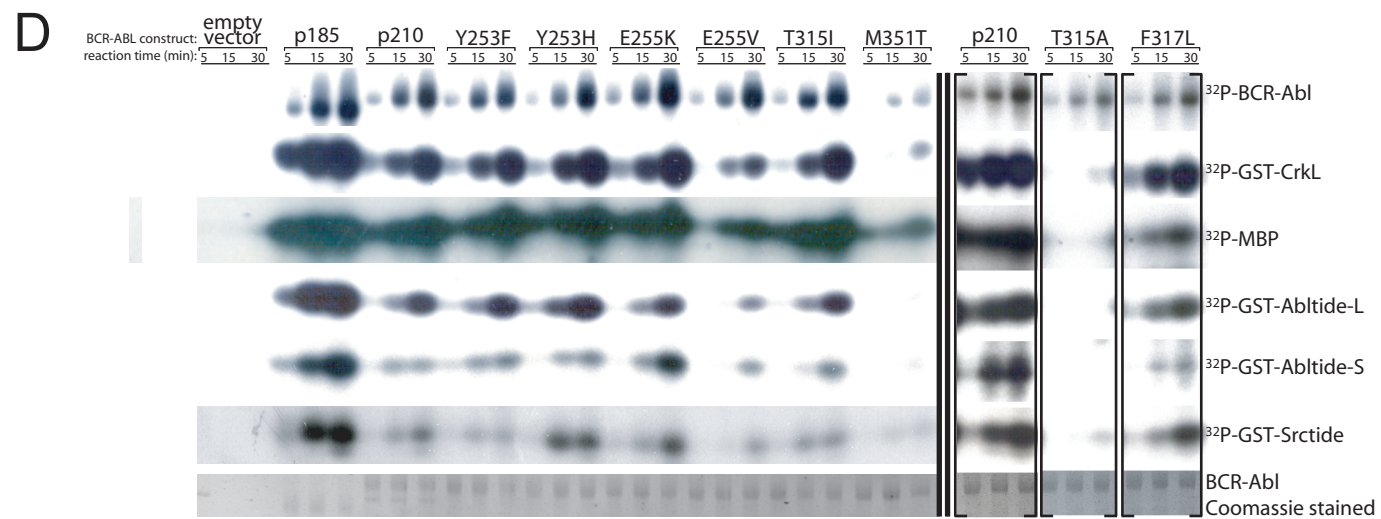

**E**

|       | Vmax (pmol ATP/min/ $\mu$ g kinase) | Vmax SE | Km ( $\mu$ M Abltide) | Km SE | ratio Vmax vs. p210 | Vmax/Km | ratio Vmax/Km vs. p210 |
|-------|-------------------------------------|---------|-----------------------|-------|---------------------|---------|------------------------|
| E255K | 132.50                              | 27.38   | 44.10                 | 25.27 | 358.69              | 3.00    | 224.73                 |
| Y253F | 95.07                               | 17.02   | 54.82                 | 24.93 | 257.36              | 1.73    | 129.71                 |
| p210  | 36.94                               | 3.70    | 27.63                 | 9.33  | 100.00              | 1.34    | 100.00                 |
| Y253H | 26.44                               | 2.85    | 10.62                 | 5.86  | 71.58               | 2.49    | 186.22                 |
| T315I | 12.85                               | 1.15    | 12.78                 | 5.38  | 34.79               | 1.01    | 75.21                  |
| E255V | 17.81                               | 2.31    | 21.11                 | 10.35 | 48.21               | 0.84    | 63.10                  |
| F317L | 12.42                               | 1.59    | 24.10                 | 10.99 | 33.62               | 0.52    | 38.55                  |
| M351T | 8.95                                | 2.01    | 44.80                 | 27.82 | 24.21               | 0.20    | 14.93                  |
| T315A | 1.47                                | 0.38    | 28.40                 | 24.57 | 3.98                | 0.05    | 3.87                   |
