# Supplementary material
Source: PubMed Central journal article supplement (PMC1748249)
Supplement: pnas_0609239103_2.pdf [file pnas_0609239103_2.pdf]

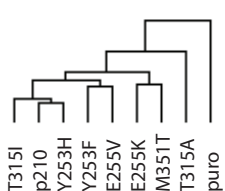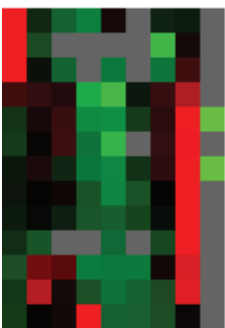

ABL1 pY257 LGGGQYGEVpYEGVWVK (2+) score=65 n=33  
 ABL1 pY257 LGGGQYGEVpYEGVWKK (2+) score=45 n=14  
 ABL1 pY257 LGGGQYGEVpYEGVWKK (3+) score=59 n=19  
 ABL1 pY128 HSWpYHGPVSR (3+) score=42 n=38  
 ABL1 pY393 LMTGDTpYTAHAGAK (2+) score=96 n=52  
 ABL1 pY264 pYSLTVAVK (2+) score=60 n=18  
 ABL1 pY393 LMTGDTpYTAHAGAK (3+) score=83 n=55  
 BCR pY644 NSLETLpYKPVDR (2+) score=92 n=46  
 ABL1 pY115 NGQGWWPSNpYITPVNSLEK (2+) score=59 n=46  
 ABL1 pY253 LGGGQpYGEVYEGVWVK (2+) score=54 n=9  
 ABL1 pY469 VpYELMR (2+) score=37 n=47  
 ABL1 pY469 MERPEG\*CEKVPYELMR (3+) score=65 n=20  
 ABL1 pY413 WTAPESLApYNK (2+) score=56 n=38

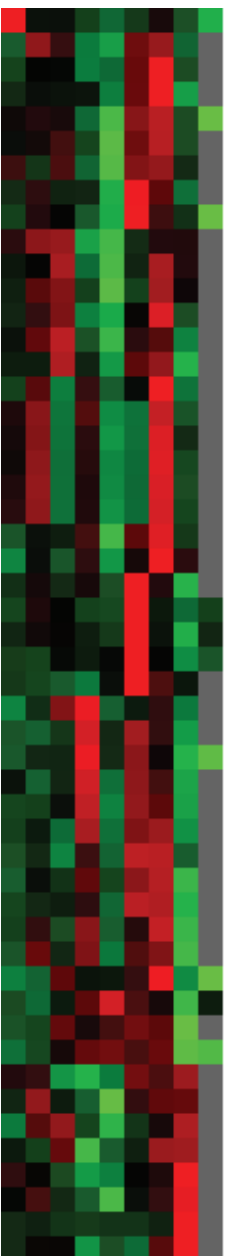

Ddb1 pY718 TVLPpYESPR (2+) score=52 n=47  
 Hist1h2bb pY43 KESYSVYVpYK (2+) score=74 n=21  
 Dyrk1a pY145 VYNDGYDDDNpYDYIVK (2+) score=86 n=46  
 Fcho1 pY20 NHGFELpYH\*CVK (3+) score=41 n=28  
 Rps10 pY12 IAIPYELLFK (2+) score=59 n=52  
 Vasp pY39 VQIPYHNPTANSFR (2+) score=76 n=52  
 Fkbp4 pY220 GEHSIVpYLKPSYAFGSVVK (3+) score=57 n=37  
 Dbi pY77 TQPTDEEMLFpYSHFK (2+) score=68 n=32  
 Dbi pY77 TQPTDEEMLFpYSHFK (3+) score=49 n=51  
 Sh3px3 pY264 LPTTHAGSPVpYR (2+) score=62 n=39  
 0610016J10Rik pY210 YSYDESQGEIpYR (2+) score=66 n=51  
 Psm2 pY76 HIGLVpYSGMGPDYR (2+) score=101 n=47  
 Prpsap2 pY52 VQVPYQEPNR (2+) score=45 n=7  
 Eif3s6ip pY415 GDPQVYEEELFSpYA\*CPK (2+) score=75 n=38  
 Psm4 pY102 VNDSTMLGASGDpYADFYLLK (2+) score=103 n=19  
 Pabpc2 pY364 IVATKLPYVALAQR (2+) score=83 n=14  
 Nedd9 pY91 LpYQVNSQAASR (2+) score=66 n=40  
 Nedd9 pY344 DGVpYDVPLHNPADAK (3+) score=40 n=24  
 Nedd9 pY344 DGVpYDVPLHNPADAK (2+) score=86 n=28  
 Nedd9 pY165 TGHGYVpYEYPSR (2+) score=39 n=29  
 Nedd9 pY165 TGHGYVpYEYPSR (3+) score=34 n=21  
 Ddx1 pY628 VWpYHV\*CSNR (2+) score=58 n=24  
 Ppm1b pY367 HVIEAVpYSR (2+) score=41 n=2  
 Dbi pY77 TQPTDEE\*MLFpYSHFK (3+) score=29 n=5  
 Eno1 pY44 AAVPSGASTGlpYEALELR (2+) score=132 n=44  
 Eno1 pY44 AAVPSGASTGlpYEALELR (3+) score=68 n=16  
 Eno1 pY25 GNPTVEVDLpYTAK (2+) score=57 n=48  
 Csk pY184 VMEGTVAAQDEFpYR (2+) score=61 n=8  
 Alkbh3 pY127 EDVTPYQQR (2+) score=33 n=23  
 Flnb pY904 DLDIIDNYDpYSHTVK (3+) score=77 n=17  
 Hspcb pY484 SlpYYITGESK (2+) score=61 n=55  
 Msn pY270 APDFVFPYAPR (2+) score=47 n=30  
 Tln1 pY70 ALDPYYMLR (2+) score=46 n=17  
 Hspa8 pY41 TTPSpYVAFTDTER (2+) score=80 n=14  
 Lcp1 pY28 VDTDGNpYIS\*CNELNDFK (2+) score=94 n=7  
 Eef1a1 pY29 STTTGHLpYK (3+) score=35 n=23  
 Hgs pY216 V\*CEP\*CpYEQLNK (2+) score=35 n=7  
 Pabpc2 pY364 IVATKLPYVALAQR (3+) score=62 n=49  
 Cep55 pY377 #QNMQHQLpYVILK (2+) score=65 n=38  
 D8Ert82e pY196 DPVQPEIPYAESAK (2+) score=48 n=56  
 Fcer1g pY76 SQETpYETLK (2+) score=33 n=21  
 Pik3r1 pY467 LpYEEYTR (2+) score=44 n=37  
 Fcer1g pY65 ADAVpYTGLNTR (2+) score=67 n=36  
 Sorbs1 pY356 SlpYEQPGK (2+) score=43 n=24  
 Actn1 pY246 AIMTYVSSFpYHAFSGAQK (2+) score=85 n=34  
 Dyrk1a pY111 HINEVpYYAK (2+) score=49 n=20  
 Gab2 pY263 DSTpYDLPR (2+) score=57 n=37  
 Pdlim5 pY251 NTEFpYHIPHSDASK (3+) score=41 n=48  
 Actn1 pY246 AIMTYVSSFpYHAFSGAQK (3+) score=65 n=43  
 Grb2 pY209 NpYVTPVNR (2+) score=51 n=39  
 Sh2d5 pY325 LGNPPY\*CSPTLVR (2+) score=61 n=25

BCR-ABL

Downstream phosphorylation events
