# Supplementary material
Source: PubMed Central journal article supplement (PMC1748249)
Supplement: pnas_0609239103_5.pdf [file pnas_0609239103_5.pdf]

A

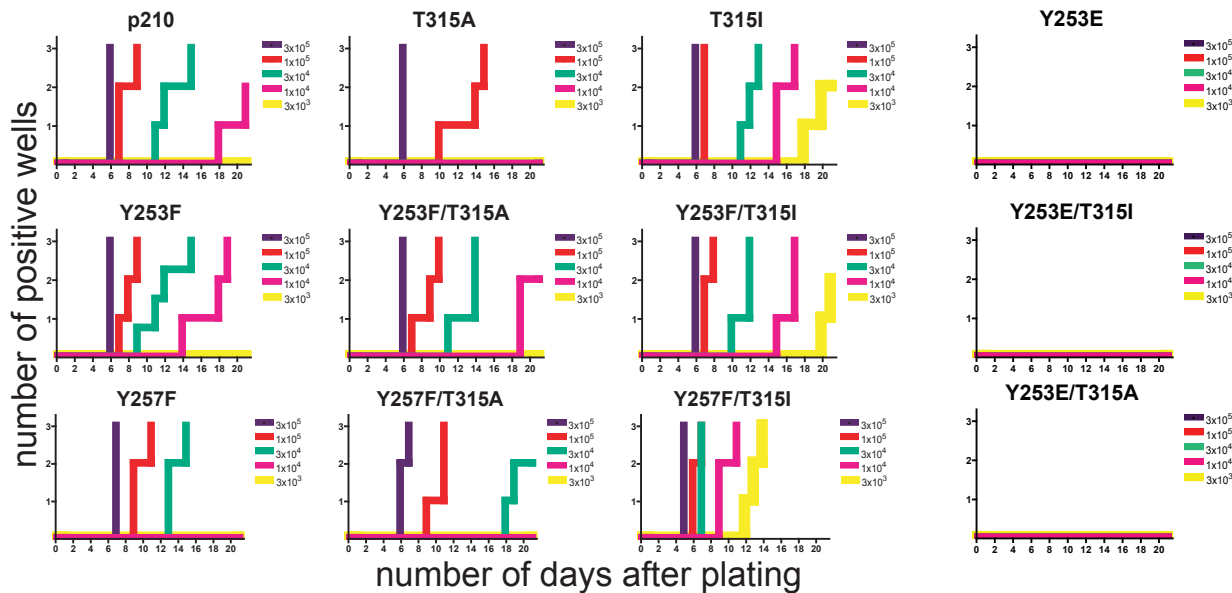

B

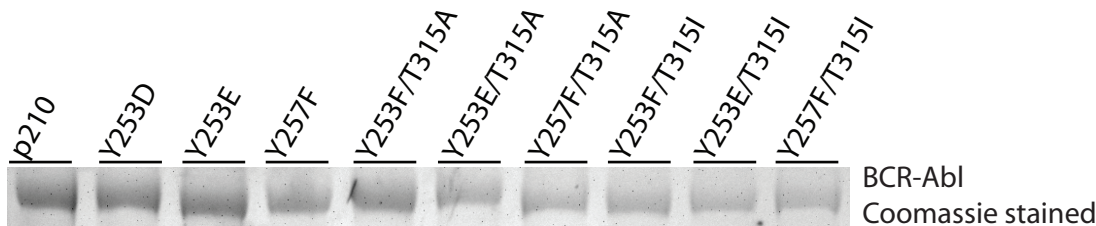

C

|             | Vmax (pmol<br>ATP/min/ $\mu$ g<br>kinase) | Vmax SE | Km ( $\mu$ M<br>Abltide) | Km SE | ratio<br>Vmax vs.<br>p210 |
|-------------|-------------------------------------------|---------|--------------------------|-------|---------------------------|
| Y253F       | 84.50                                     | 8.89    | 53.81                    | 14.49 | 103.48                    |
| p210        | 81.66                                     | 13.65   | 64.32                    | 25.67 | 100.00                    |
| T315I       | 35.83                                     | 3.56    | 30.48                    | 9.80  | 43.88                     |
| Y253F/T315I | 38.19                                     | 5.64    | 45.89                    | 18.50 | 46.77                     |
| Y257F       | 27.43                                     | 3.66    | 43.46                    | 16.19 | 33.59                     |
| T315A       | 12.97                                     | 3.29    | 97.58                    | 50.55 | 15.88                     |
| Y253F/T315A | 9.79                                      | 1.16    | 49.97                    | 15.56 | 11.99                     |
| Y257F/T315A | 2.43                                      | 0.57    | 3.66                     | 7.98  | 2.98                      |
| Y257F/T315I | 2.00                                      | 0.36    | 1.00E-07                 | 3.99  | 2.45                      |
