# Supplementary material
Source: PubMed Central journal article supplement (PMC1748249)

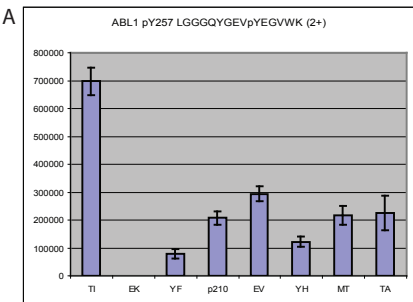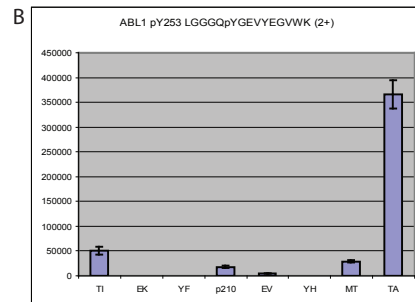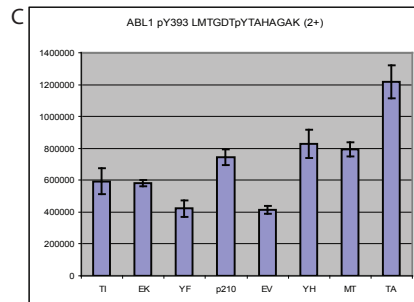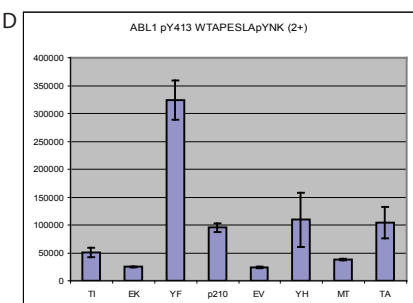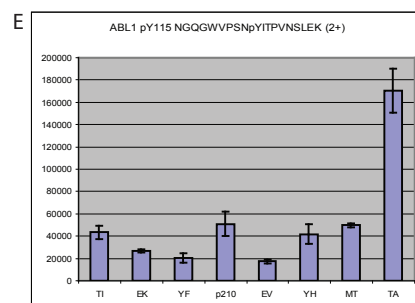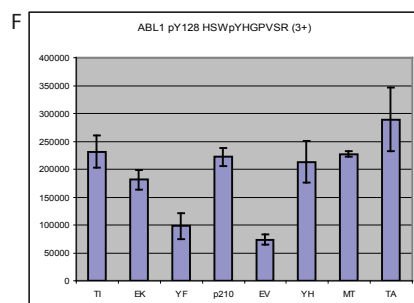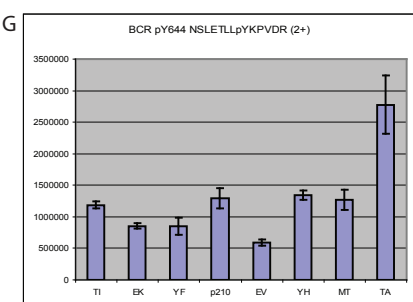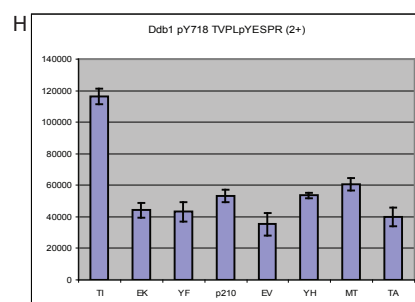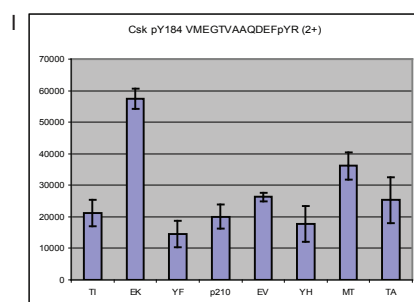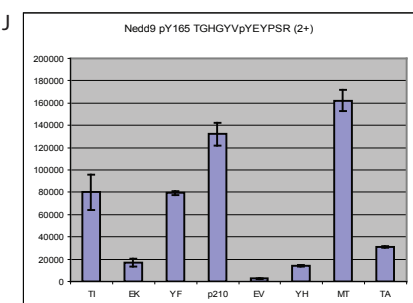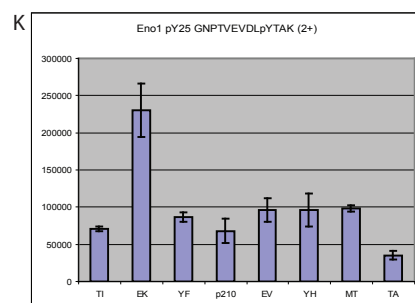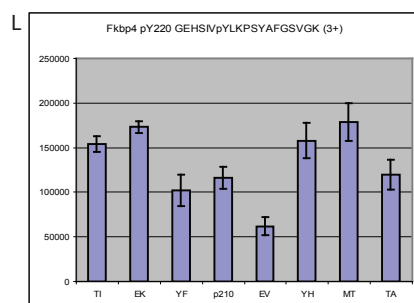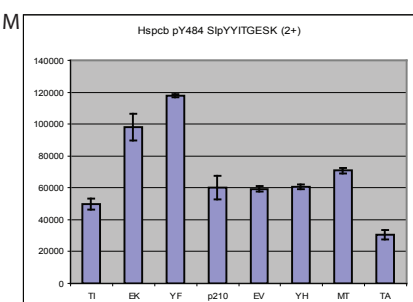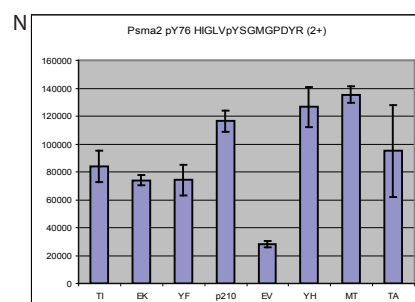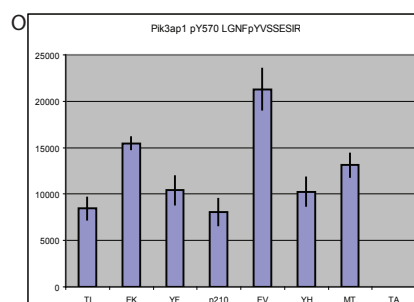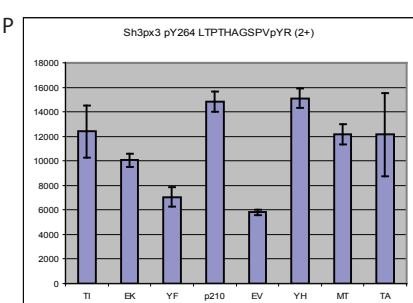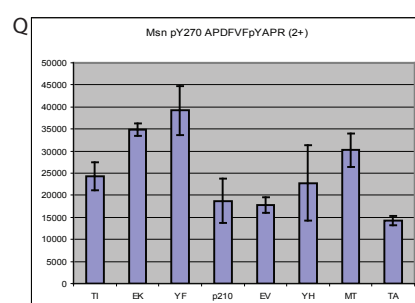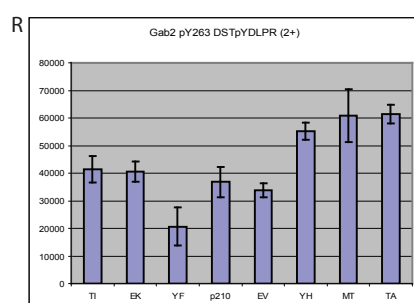

Supplement: pnas_0609239103_3.pdf [file pnas_0609239103_3.pdf]

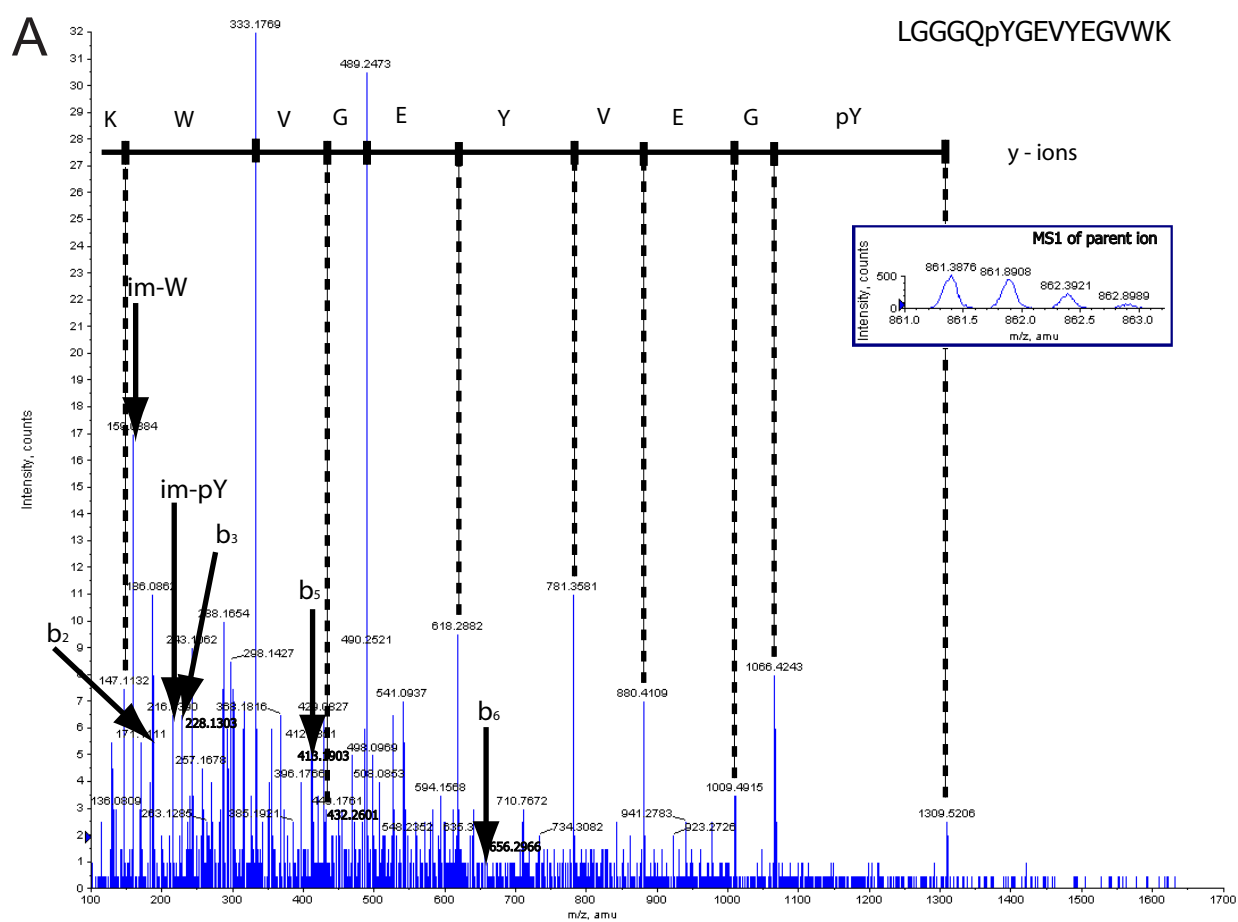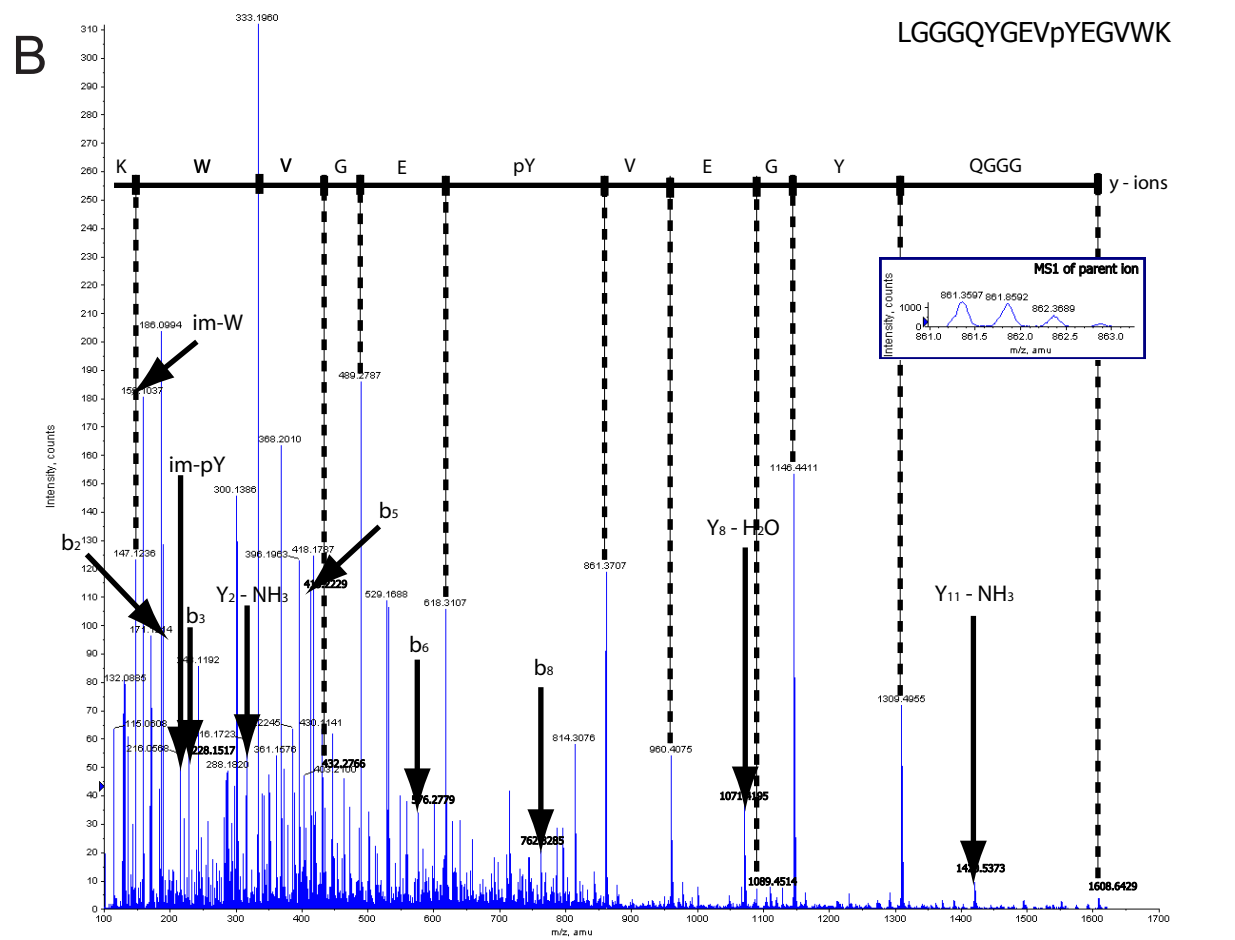

Supplement: pnas_0609239103_4.pdf [file pnas_0609239103_4.pdf]
